# Supplementary material for: Correlation between electrochromism and electronic structures of tungsten oxide films
Source: Royal Society of Chemistry journal article supplement (doi:10.1039/c3ra45421e), 2013-12-03
Supplement: c3ra45421e.pdf [file c3ra45421e.pdf]

## Supplementary Information

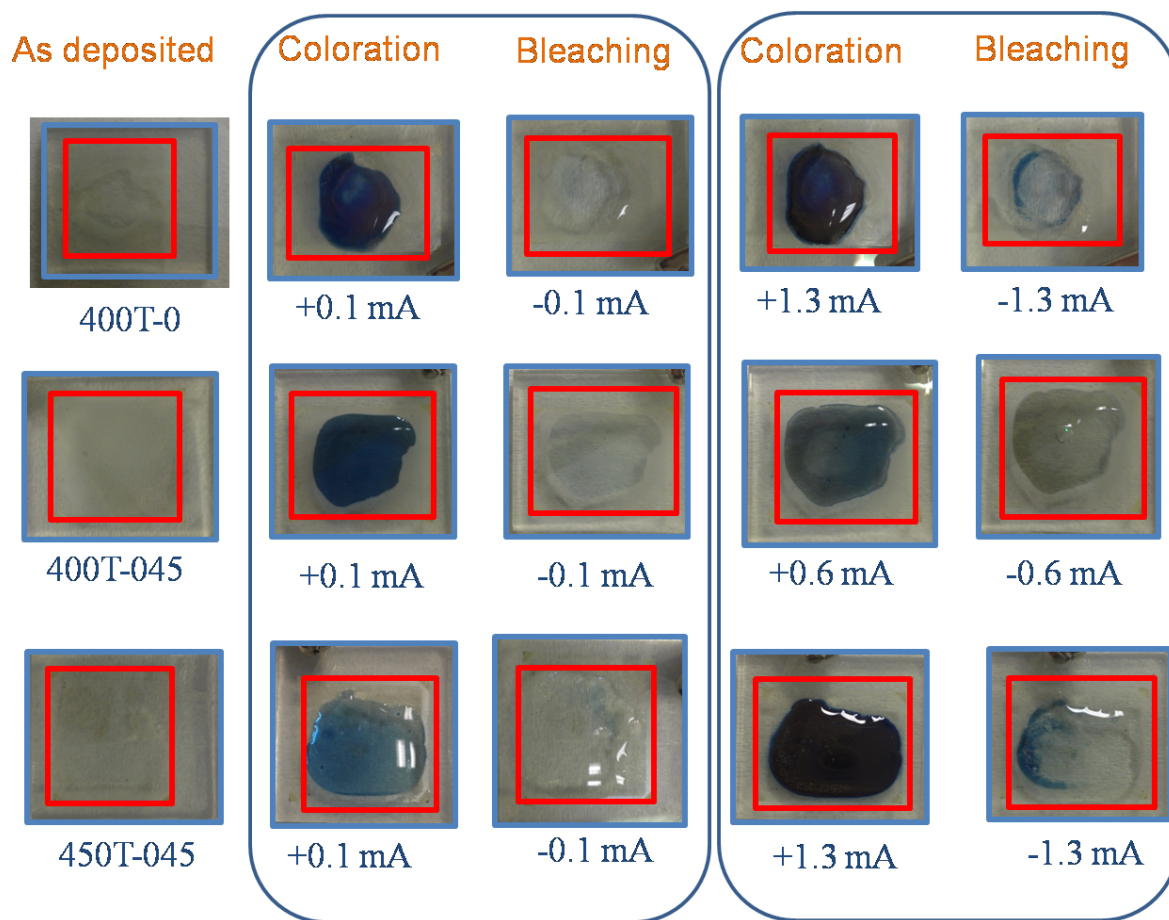

**Fig. S1** Photographs of the as deposited (bare) tungsten oxide (400T-0, 400T-045 and 450T-045) films and colored and bleached films under application of external bias, taken outside the electrolytic cell (not to the scale). For 0.1mA current the recovery of the EC properties is superior compared to other higher current values.

| Samples  | Recovery time for first cycle ( x 3min.) |                           |                           |                           |                           |
|----------|------------------------------------------|---------------------------|---------------------------|---------------------------|---------------------------|
|          | Current applied<br>0.1 mA                | Current applied<br>0.3 mA | Current applied<br>0.6 mA | Current applied<br>1.0 mA | Current applied<br>1.3 mA |
| 400T-0   | 3                                        | 3                         | 4                         | 2                         | No recovery               |
| 400T-045 | 1                                        | 1                         | No recovery               | -                         | -                         |
| 450T-045 | 1                                        | 3                         | 4                         | 4                         | No recovery               |

**Table S1** It shows the EC response of the tungsten oxide (400T-0, 400T-045 and 450T-045) films under application of different external bias. Recovery time of the samples from colored to bleach state is less when 0.1 mA current is applied.

| <b>Sample</b>   | <b>Coloration efficiency (cm<sup>2</sup>C<sup>-1</sup>)</b> | <b>Transmittance modulation at 632 nm after 30 cycles</b> | <b>Diffusion Coefficient (cm<sup>2</sup>S<sup>-1</sup>)</b> |
|-----------------|-------------------------------------------------------------|-----------------------------------------------------------|-------------------------------------------------------------|
| <b>400T-0</b>   | <b>7</b>                                                    | <b>~10%</b>                                               | <b>10<sup>-14</sup>~10<sup>-12</sup></b>                    |
| <b>400T-045</b> | <b>37</b>                                                   | <b>~40%</b>                                               | <b>10<sup>-11</sup>~10<sup>-10</sup></b>                    |
| <b>450T-045</b> | <b>6</b>                                                    | <b>~10%</b>                                               | <b>10<sup>-14</sup>~10<sup>-12</sup></b>                    |

**Table S2.** Electrochromic properties like coloration efficiency, transmittance modulation at wavelength 632 nm after 30 cycles and diffusion coefficient of tungsten oxide thin films when ~20 mC cm<sup>-2</sup> Li<sup>+</sup> ions are injected.<sup>13</sup>
